# Supplementary material
Source: ML conference proceedings conference paper supplement (https://proceedings.mlr.press/v89/xie19a.html)
Supplement: Supplementary file [file xie19a-supp.pdf]

---

# Supplementary Materials: Online Decentralized Leverage Score Sampling for Streaming Multidimensional Time Series

---

## 1 Proofs

2 *Proof of Theorem 5.1.*

3 Let  $\mathbf{U}_t = 1_{\{\mathbf{x}_t \in \mathcal{E}_r\}} \mathbf{X}_t$ . By equation (2), we have

$$\sqrt{n}(\hat{\boldsymbol{\beta}} - \boldsymbol{\beta}) = \left( \frac{1}{n} \sum_{t=1}^n \mathbf{U}_t \mathbf{U}_t' \right)^{-1} \left( \frac{1}{\sqrt{n}} \sum_{t=1}^n \mathbf{U}_t \mathbf{e}_t' \right), \quad (1)$$

4 which is understood as  $-\sqrt{n}\boldsymbol{\beta}$  if the invertibility fails. Note that

$$\mathbb{E}[\text{vec}(\mathbf{U}_t \mathbf{e}_t') \text{vec}((\mathbf{U}_t \mathbf{e}_t')')] = \boldsymbol{\Omega} \otimes \Gamma(r). \quad (2)$$

5 For any column vector  $\mathbf{a} \in \mathbb{R}^{K^2 p}$ , the linear combination  $\mathbf{a}' \text{vec}(\mathbf{U}_t) \mathbf{e}_t$  forms a stationary  
6 martingale difference in  $t$  with respect to the filtration  $\mathcal{F}_t = \sigma(\mathbf{e}_i, i \leq t)$  since  $\mathbf{U}_t$  is  $\mathcal{F}_{t-1}$ -  
7 measurable and  $\mathbf{e}_t$  is centered and independent of  $\mathcal{F}_{t-1}$ . By (2) and the Martingale Central  
8 Limit Theorem (Theorem 35.12 of [Billingsley 1995 Probability and Measure 3rd ed.]), as  
9  $n \rightarrow \infty$ ,

$$\frac{1}{\sqrt{n}} \sum_{t=1}^n \mathbf{a}' \text{vec}(\mathbf{U}_t \mathbf{e}_t') \xrightarrow{d} N(0, \mathbf{a}' \boldsymbol{\Omega} \otimes \Gamma(r) \mathbf{a}).$$

10 In view of the Cramer-Wold Device, we have thus shown that as  $n \rightarrow \infty$ ,

$$\frac{1}{\sqrt{n}} \sum_{i=1}^n \text{vec}(\mathbf{U}_t \mathbf{e}_t') \xrightarrow{d} N(\mathbf{0}, \boldsymbol{\Omega} \otimes \Gamma(r)). \quad (3)$$

11 On the other hand, each component of the  $\mathbf{U}_t$  is a causal linear filter of i.i.d. (thus ergodic)  
12  $\mathbf{e}_t$ , and is hence an ergodic sequence by Lemma 10.5 of [Kallenberg 2002 Foundations of  
13 Modern Probability 2nd ed]. Therefore, by the Birkhoff Ergodic Theorem (Theorem 10.6 of  
14 [Kallenberg]) applied to each entry, one has almost surely as  $n \rightarrow \infty$  that

$$\frac{1}{n} \sum_{i=1}^n \mathbf{U}_t \mathbf{U}_t' \rightarrow \Gamma(r). \quad (4)$$

15 At last, notice that the invertible matrices of a fixed size form an open subset under the  
16 product topology. Hence  $\frac{1}{n} \sum_{i=1}^n \mathbf{U}_t \mathbf{U}_t'$  is invertible with probability tending to one as  
17  $n \rightarrow \infty$ . Combining (1), (3) and (4) yields (12).  $\square$

18 *Proof of Theorem 5.2.*

19 The case of consecutive sampling can be directly deduced from Theorem 5.1 by letting  
20  $E = \mathbb{R}^m$  and substituting  $n$  by  $nq$ . For the Bernoulli sampling, the proof can be carried  
21 out similarly as the proof of Theorem 5.1. In particular, the indicator  $1_{\{\mathbf{x}_t \in E\}}$  is replaced  
22 by i.i.d. Bernoulli( $q$ ) variables independent of the time series  $(\mathbf{Y}_t)$ , which still retains the  
23 martingale property used in the proof of Theorem 5.1.

24  $\square$

25 *Proof of Theorem 5.3.*

26 (a) Since  $\mathbf{e}_t$ 's are Gaussian, for each  $t \in \mathbb{Z}$ ,  $\mathbf{X}_t \sim N(\mathbf{0}, \Gamma)$ . Let  $\mathbf{X} = (X_1, \dots, X_m) \stackrel{d}{=} \mathbf{X}_t$ , and  
 27 let  $\mathbf{Z} = \Gamma^{-1/2}\mathbf{X} \sim N(\mathbf{0}, I_m)$ . Then

$$\Pr(\mathbf{X} \in \mathcal{E}_r) = \Pr(\mathbf{Z} \in \mathcal{D}_r) = \Pr(\chi_m^2 > r^2) = Q(m, r).$$

28 (b) For any column vector  $\mathbf{a} \in \mathbb{R}^m$  with  $\|\mathbf{a}\| = 1$ , define

$$\begin{aligned} F(\mathbf{a}; \mathcal{E}_r) &:= \mathbf{a}'(\Gamma(r) - Q(m, r)\Gamma)\mathbf{a} \\ &= \mathbb{E} \left[ \left( \sum_{i=1}^m a_i X_i \right)^2 [1_{\{\mathbf{X} \in \mathcal{E}_r\}} - Q(m, r)] \right]. \end{aligned} \quad (5)$$

29 Let  $\phi_\Gamma$  denote the density of  $N(\mathbf{0}, \Gamma)$ . Then by a change of variable  $\mathbf{x} = \Gamma^{1/2}\mathbf{y}$ ,

$$\begin{aligned} F(\mathbf{a}; \mathcal{E}_r) &= \int (\mathbf{a}'\mathbf{x})^2 [1_{\mathcal{E}_r}(\mathbf{x}) - Q(m, r)] \phi_\Gamma(\mathbf{x}) d\mathbf{x} \\ &= \int (\mathbf{a}'P'\Lambda^{1/2}P\mathbf{y})^2 [1_{\mathcal{D}_r}(\mathbf{y}) - Q(m, r)] \phi_{I_m}(\mathbf{y}) d\mathbf{y}. \end{aligned}$$

30 Let  $\mathbf{b} = (b_1, \dots, b_m)' = P\mathbf{a}$ . By orthogonality of  $P$ , we have  $\|\mathbf{b}\| = 1$  as well. By a change  
 31 of variable  $\mathbf{z} = (z_1, \dots, z_m)' = P\mathbf{y}$ , and using the invariance of  $d\mathbf{z}$ ,  $\phi_I$  and  $\mathcal{D}_r$  with respect  
 32 to an orthogonal transform, we have

$$\begin{aligned} F(\mathbf{a}(\mathbf{b}); \mathcal{E}_r) &= \int \left( \sum_{i=1}^m b_i \lambda_i^{1/2} z_i \right)^2 [1_{\mathcal{D}_r}(\mathbf{z}) - Q(m, r)] \phi_{I_m}(\mathbf{z}) d\mathbf{z}. \end{aligned} \quad (6)$$

33 By the symmetry of  $\mathcal{D}_r$  and  $\phi_{I_m}$ , the ‘‘covariance’’

$$\int z_i z_j [1_{\mathcal{D}_r}(\mathbf{z}) - Q(m, r)] \phi_{I_m}(\mathbf{z}) d\mathbf{z} = 0, \quad \text{if } i \neq j.$$

34 Hence

$$\begin{aligned} F(\mathbf{a}(\mathbf{b}); \mathcal{E}_r) &= \int \sum_{i=1}^m b_i^2 \lambda_i z_i^2 [1_{\mathcal{D}_r}(\mathbf{z}) - Q(m, r)] \phi_{I_m}(\mathbf{z}) d\mathbf{z} \\ &= \left( \int z_1^2 [1_{\mathcal{D}_r}(\mathbf{z}) - Q(m, r)] \phi_{I_m}(\mathbf{z}) d\mathbf{z} \right) \left( \sum_{i=1}^m b_i^2 \lambda_i \right). \end{aligned}$$

35 Note that

$$\min_{\|\mathbf{b}\|=1} \left( \sum_{i=1}^m b_i^2 \lambda_i \right) = \lambda_{\min},$$

36 which is positive since  $\Gamma$  is non-singular by assumption. On the other hand, we have

$$\begin{aligned} \int_{\mathcal{D}_r} z_1^2 \phi_{I_m}(\mathbf{z}) d\mathbf{z} &= \frac{1}{m} \int_{\mathcal{D}_r} \|\mathbf{z}\|^2 \\ \phi_{I_m}(\mathbf{z}) d\mathbf{z} &= \frac{1}{m} \mathbb{E}[\chi_m^2 1_{\{\chi_m^2 > r^2\}}] = T(m, r). \end{aligned}$$

37 and

$$\int z_1^2 \phi_{I_m}(\mathbf{z}) d\mathbf{z} = 1.$$

38 Hence

$$\min_{\|\mathbf{b}\|=1} F(\mathbf{a}(\mathbf{b}); \mathcal{E}_r) = \lambda_{\min} [T(m, r) - Q(m, r)].$$

39

□
